# Supplementary material for: An autonomous adaptation vision chip with in-sensor neural network based on multifunctional phototransistor
Source: Research Square preprint supplement (doi:10.21203/rs.3.rs-8435228/v1), 2026-01-20
Supplement: Supplementary file 1 [file a1b24f54ca8ff0916b63c57a.docx]

Table of contents:

Supplementary Figure 1. EDX elemental analysis of the fabricated FDSOI devices.

Supplementary Figure 2. Structure of the designed multi-terminal FDSOI device with intentionally introduced exposure region.

Supplementary Figure 3. TCAD simulation results of FDSOI devices with extended exposure region.

Supplementary Figure 4. Measured transient photocurrent response versus exposure time under different light intensities.

Supplementary Figure 5. The TCAD simulations conducted to verify the superlinear and sublinear photoresponse characteristics.

Supplementary Figure 6. Circuit design of the column decoding.

Supplementary Figure 7. Circuit design of the row decoding.

Supplementary Figure 8. Circuit design of the MUX modules.

Supplementary Figure 9. Circuit design of the integrate-and-fire ADC in the VISTA chip.

Supplementary Figure 10. Device-to-device variation of linear photoresponse.

Supplementary Figure 11. Device-to-device variation of superlinear photoresponse.

Supplementary Figure 12. Device-to-device variation of sublinear photoresponse.

Supplementary Figure 13. Neural network recognition on images enhanced by nonlinear in-sensor adaptation.

Supplementary Figure 14. Non-volatile memory characteristics of the proposed FDSOI devices.

Supplementary Figure 15. Voltage bias schemes for programming and erasing.

Supplementary Figure 16. Intermediate feature maps from each convolutional layer during processing.

Supplementary Figure 17. Road traffic information dataset for intelligent driving simulation.

Supplementary Figure 18. Influence of superlinear and sublinear photoresponse on imaging results under different illumination conditions.

Supplementary Figure 19. In-sensor neural network weight mapping results.

Supplementary Figure 20. Recognition accuracy of different sensor types across mixed lighting conditions.

**Supplementary Figure 1 | EDX elemental analysis of the fabricated FDSOI devices.** Energy-dispersive X-ray spectroscopy (EDX) mapping results confirming the elemental composition and spatial distribution in the cross-section of the fabricated fully depleted silicon-on-insulator (FDSOI) devices.

**Supplementary Figure 2 | Structure of the designed multi-terminal FDSOI device with intentionally introduced exposure region. a**, Schematic illustration of the complete cross-section of the device. **b**, Layout design of the device, in which an extended exposure region is deliberately introduced near the drain terminal to enable tunable photoresponse.

**Supplementary Figure 3 | TCAD simulation results of FDSOI devices with extended exposure region.** The local light-induced charge accumulation reduces the lateral potential drop between the drain and channel regions, effectively lowering the energy barrier.

**Supplementary Figure 4 | Measured transient photocurrent response versus exposure time under different light intensities. a**, Superlinear. **b**, Sublinear.

**Supplementary Figure 5 | The TCAD simulations conducted to verify the superlinear and sublinear photoresponse characteristics. a**, Simulated device structure and electrical bias configured for superlinear photoresponse. **b**, The superlinear relationship between photocurrent and light intensity. **c**, Simulated device structure and electrical bias configured for sublinear photoresponse. **d**, The sublinear relationship between photocurrent and light intensity.

**Supplementary Figure 6 | Circuit design of the column decoding. a**, Schematic diagram of the column address register structure. **b**, Operating logic of bit line (BL) and source line (SL) decoding.

**Supplementary Figure 7 | Circuit design of the row decoding. a**, Schematic diagram of the row address register structure. **b**, Operating logic of word line (WL) and well line (Well) decoding.

**Supplementary Figure 8 | Circuit design of the MUX modules. a**, MUX design for WL, BL, and SL terminals. In addition to enabling read (exposure) operations within the normal voltage domain, programming and erasing require analog levels ranging from 0 V to 2.8 V. Therefore, the driving circuits adopt a design that integrates level shifters with transmission gates. **b**, MUX design for Well terminals. Since well biasing during normal operation typically involves a fixed negative voltage without intermediate analog levels, domain switching via a negative-voltage level shifter is sufficient to meet the requirements.

**Supplementary Figure 9 | Circuit design of the integrate-and-fire ADC in the VISTA chip.**

**Supplementary Figure 10 | Device-to-device variation of linear photoresponse.** Relationship between photocurrent and light intensity measured from 20 randomly selected devices within the VISTA chip, demonstrating uniform linear photoresponse characteristics across the device array.

**Supplementary Figure 11 | Device-to-device variation of superlinear photoresponse.** Measured photocurrent versus light intensity for 20 randomly selected devices within the VISTA chip, illustrating consistent superlinear photoresponse behavior across the device array.

**Supplementary Figure 12 | Device-to-device variation of sublinear photoresponse.** Measured photocurrent as a function of light intensity for 20 randomly selected devices within the VISTA chip, demonstrating consistent sublinear photoresponse characteristics across the device array.

**Supplementary Figure 13 | Neural network recognition on images enhanced by nonlinear in-sensor adaptation. a**, Evaluation setup illustrating the process of brightness transformation and in-sensor nonlinear photoresponse enhancement applied to input images. **b**, Comparison of recognition accuracy between original images and those enhanced by the in-sensor adaptation under dim and bright lighting conditions, demonstrating improved classification performance after enhancement.

**Supplementary Figure 14 | Non-volatile memory characteristics of the proposed FDSOI devices. a**, Schematic illustration of the charge-trapping mechanism in the front gate dielectric layer enabling programming and erasing operations analogous to NOR Flash memory. **b**, Flowchart depicting the bidirectional programming and erasing procedure incorporating a step-back mechanism for precise control. **c**, Transfer characteristics (*ID*–*VGS*) showing threshold voltage shifts corresponding to different programmed memory states.

**Supplementary Figure 15 | Voltage bias schemes for programming and erasing. a**, Voltage bias configuration during programming to minimize unintended disturbance in unselected devices. **b**, Voltage bias configuration during erasing to prevent disturbance and ensure selective device operation.

**Supplementary Figure 16 |** **Intermediate feature maps from each convolutional layer during processing.**

**Supplementary Figure 17 | Road traffic information dataset for intelligent driving simulation. a**, Sample images from the self-constructed road traffic dataset designed to emulate intelligent driving scenarios. **b**, Examples of image enhancement operations applied to the dataset to simulate different views.

**Supplementary Figure 18 | Influence of superlinear and sublinear photoresponse on imaging results under different illumination conditions.** **a**, The first row is input images under three different overexposed conditions. The second row is imaging results from a sensor with fixed superlinearity. On one hand, when the fixed superlinearity is not enough for input image, overexposure still exists and affects the imaging results. On the other hand, when the fixed superlinearity is excessive, parts of the figures are not clear enough for recognition. The third row is imaging results from a sensor with autonomous adaptation. The results show that real-time adaptive degree of superlinearity achieves better image quality than fixed degree of superlinearity. **b**, The first row is input images under three different underexposed conditions. The second row is imaging results from a sensor with fixed subinearity. On one hand, when the fixed sublinearity is not enough for input image, underexposure still exists and affects the imaging results. On the other hand, when the fixed sublinearity is excessive, the target may be confused with noise and recognized as wrong objects. The third row is imaging results from a sensor with autonomous adaptation. The results show that real-time adaptive degree of sublinearity achieves better image quality than fixed degree of sublinearity.

**Supplementary Figure 19 | In-sensor neural network weight mapping results.** **a**, Corresponding conductance states programmed in the first fully connected (FC1) layer devices. **b**, Weight distribution of the second fully connected (FC2) layer mapped onto the device array.

**Supplementary Figure 20 | Recognition accuracy of different sensor types across mixed lighting conditions. a**, Linear sensor. **b**, Superlinear sensor. **c**, Sublinear sensor. **d**, Autonomous adaptation sensor based on the VISTA chip.
